# Supplementary material for: A Novel Partitivirus in the Hypovirulent Isolate QT5-19 of the Plant Pathogenic Fungus Botrytis cinerea
Source: PubMed Central journal article supplement (PMC6356794; doi:10.3390/v11010024), 2019-01-03
Supplement: viruses-11-00024-s001.pdf [file viruses-11-00024-s001.pdf]

Supporting Information

## A Novel Partitivirus in the Hypovirulent Isolate QT5-19 of the Plant Pathogenic Fungus *Botrytis cinerea*

Kamaruzzaman<sup>1</sup>, Guoyuan He<sup>1</sup>, Mingde Wu<sup>1</sup>, Jing Zhang<sup>1</sup>, Long Yang<sup>1</sup>, Weidong Chen<sup>2</sup> and Guoqing Li<sup>\*</sup>

<sup>1</sup> The Key Laboratory of Plant Pathology of Hubei Province and The State Key Laboratory of Agricultural Microbiology, Huazhong Agricultural University, Wuhan 430070, China.

<sup>2</sup> U. S. Department of Agriculture, Agricultural Research Service, Washington State University, Pullman, WA, 99164, USA.

\* Correspondence: guoqingli@mail.hzau.edu.cn

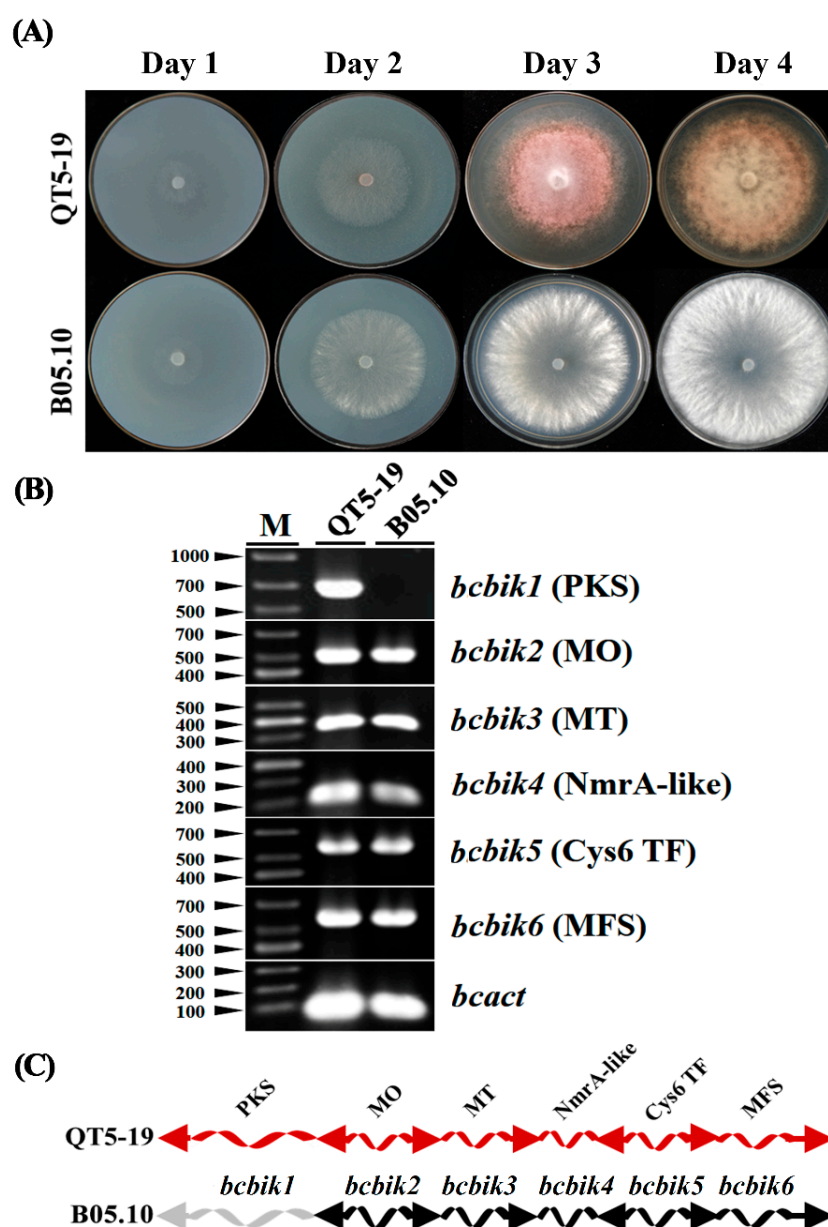



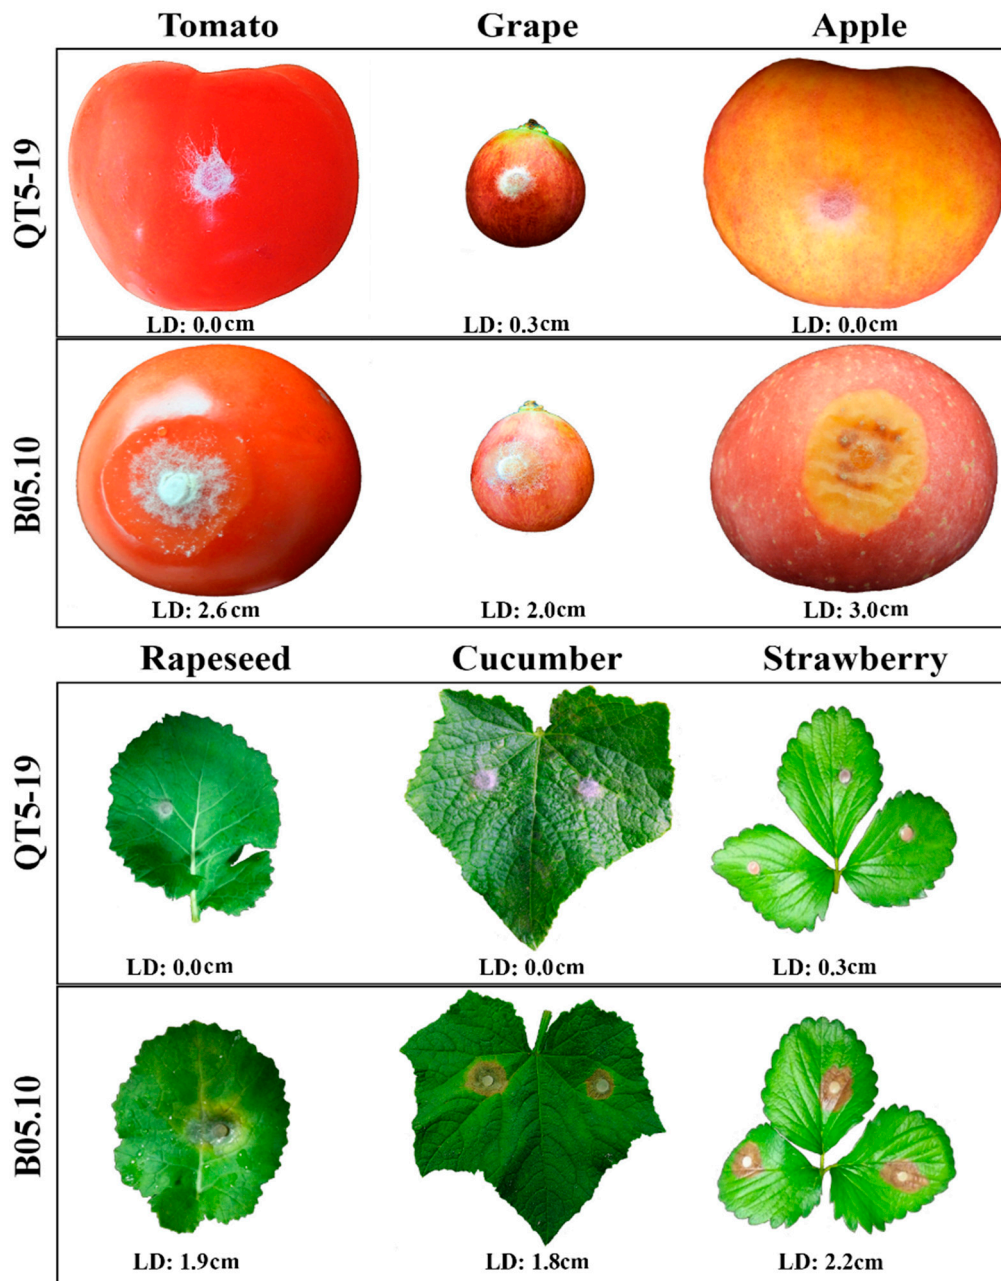

**Figure S3.** Pathogenicity of isolates QT5-19 and B05.10 of *B. cinerea* on fruits of tomato, table grapes and apple, and on leaves of cucumber, rapeseed and strawberry. Mycelial agar plugs (5 mm) of QT5-19 and B05-10 were placed on the surface of the fruits and leaves, which were kept at 20°C under humid conditions for 3 days. LD = lesion diameter (on average).

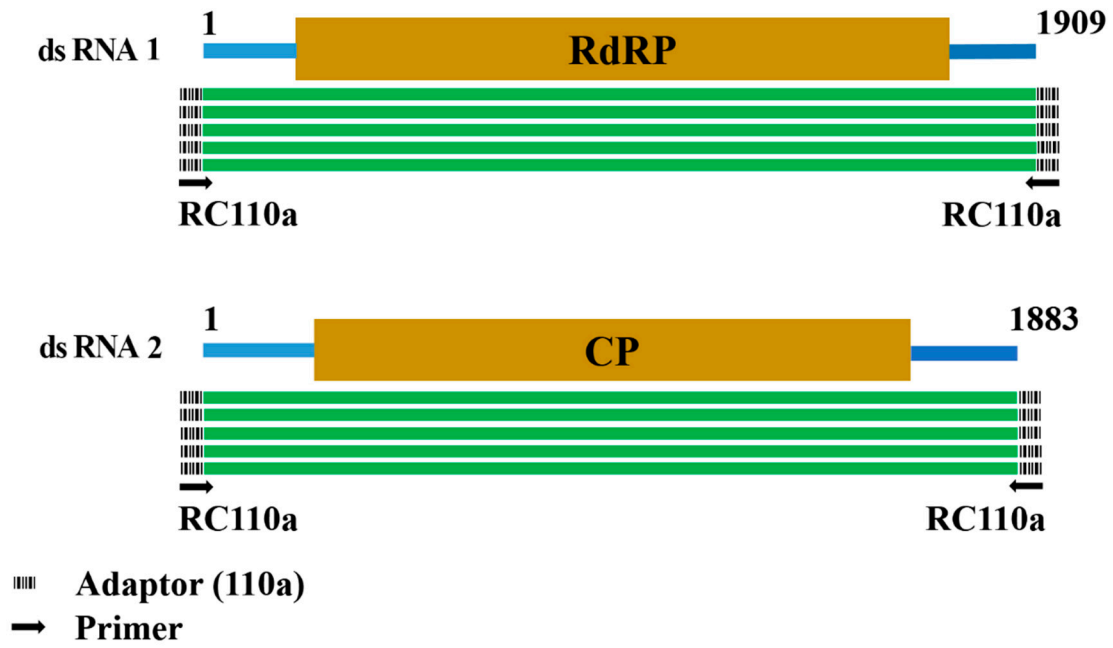

**Figure S4.** A schematic diagram showing the strategy for cDNA cloning of the full-length sequences of the two dsRNAs in *Botrytis cinerea partitivirus 2* (BcPV2). The adaptor/primers and their nucleotide sequences were listed in Table S1.

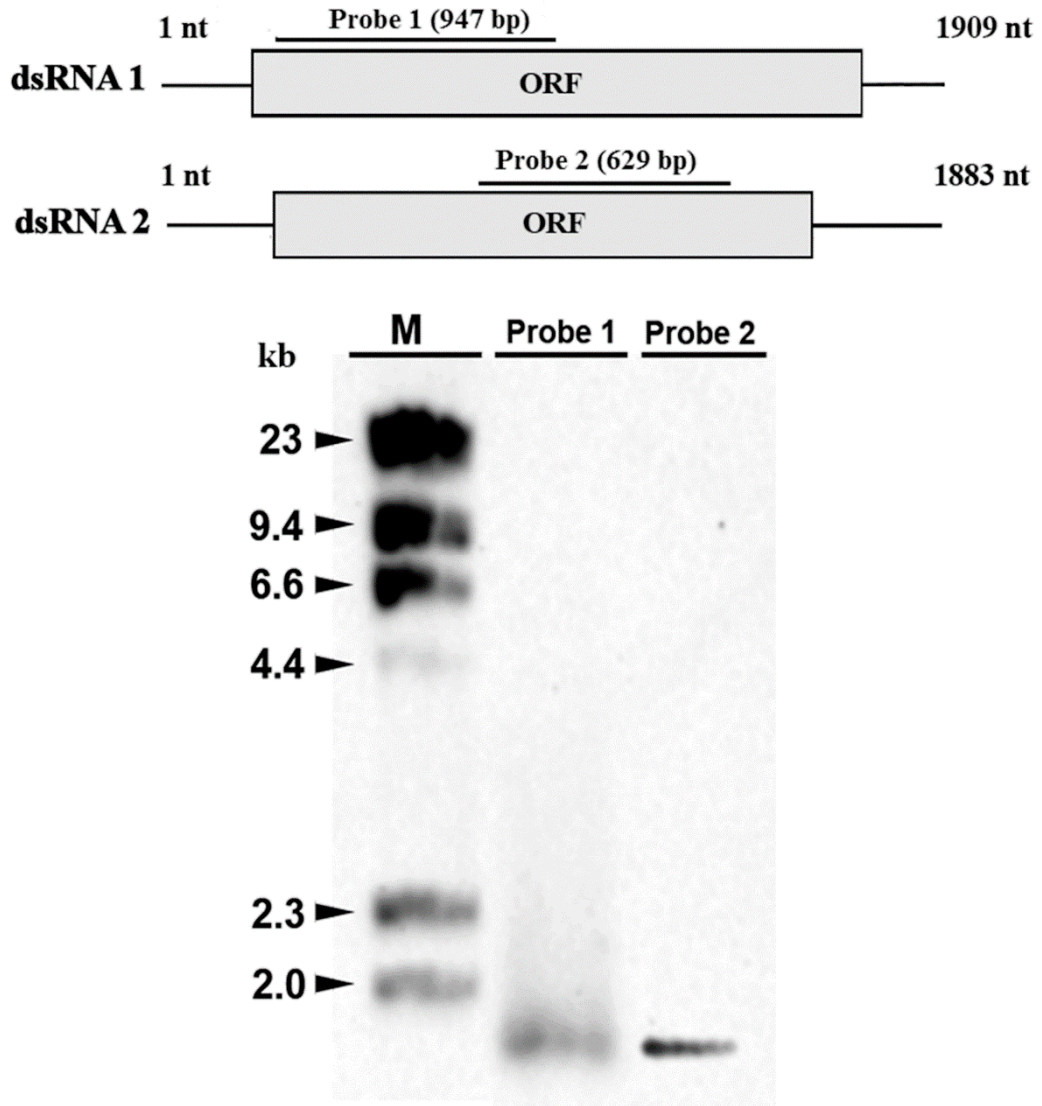

**Figure S5.** Northern-blotting detection of the dsRNAs extracted from the mycelia of *Botrytis cinerea* QT5-19. The position of the two DNA probes in the genome of BcPV2 was shown on the top.

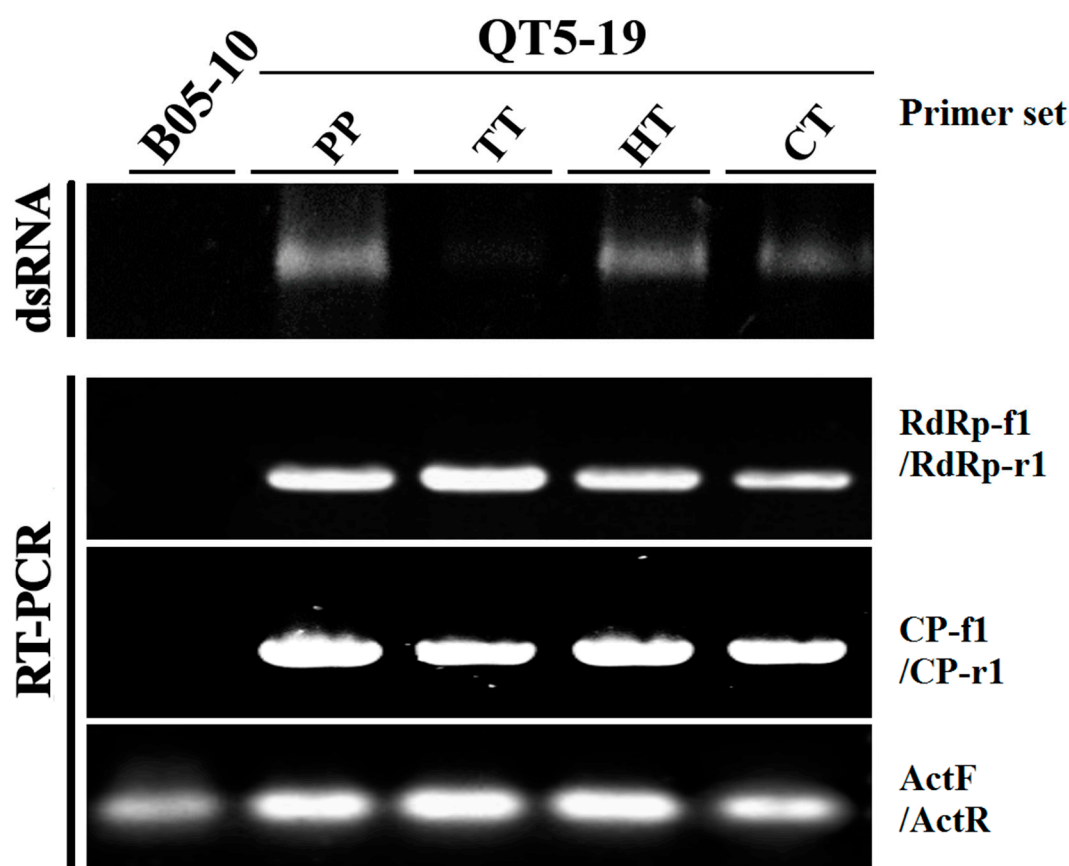

**Figure S6.** Detection of BcPV2 in different isolates of *Botrytis cinerea* by dsRNA profiling and RT-PCR. Four derivatives of QT5-19 from protoplast regeneration (PP), thermal therapy (TH), hyphal tipping (HT) and chemical therapy (CT). In dsRNA profiling, the dsRNA extracts from different isolates were treated with DNase I and S1 nuclease before loading for agarose gel electrophoresis. In RT-PCR, the actin gene *bcact* amplified by the primers ActF/ActR was used as control. The oligonucleotide sequences of the primers were shown in Supplementary Table S1.

**Table S1.** List of the oligonucleotide primers or adaptor used in this study.

| Primer name                                                                                               | Sequence (5' to 3')               | Size of the product |
|-----------------------------------------------------------------------------------------------------------|-----------------------------------|---------------------|
| To confirm the taxonomic status of isolates 08168, B05.10, QT5-19, RoseBc-3 and XN-1 as <i>B. cinerea</i> |                                   |                     |
| Bc-f                                                                                                      | CAGGAAACACTTTTGGGGATA             | 327 bp              |
| Bc-r                                                                                                      | GAGGGACAAGAAAATCGACTAA            |                     |
| To detect and clone the ITS region                                                                        |                                   |                     |
| ITS1                                                                                                      | TCCGTAGGTGAACCTGCGG               | 539 bp              |
| ITS4                                                                                                      | TCCTCCGCTTATTGATATGC              |                     |
| To synthesize cDNAs of BcPV2                                                                              |                                   |                     |
| 110a                                                                                                      | (PO4)-TATCTTATCGGCGTGTCCCCC-(NH2) | 1930 bp for dsRNA1  |
| RC110a                                                                                                    | GGGGACACGCCGATAAGATA              | 1904 bp for dsRNA2  |
| To detect the cDNA insert in the plasmid pMD18-T                                                          |                                   |                     |
| M13F-47                                                                                                   | CGCCAGGGTTTTCCCAGTCACGAC          | 1930 bp for dsRNA1  |
| M13R-48                                                                                                   | AGCGGATAACAATTTACACAGGA           | 1904 bp for dsRNA2  |
| To detect BcPV2/QT5-19 in RT-PCR                                                                          |                                   |                     |
| RdRp-f1                                                                                                   | GTTCCGACCTCATCGTCGTT              | 970 bp              |
| RdRp-r1                                                                                                   | TGCTTCGGAGGTAAGGGTTG              |                     |
| CP-f1                                                                                                     | CCGTTCCCTTTACACGCCAG              | 796 bp              |
| CP-r1                                                                                                     | ACGTGTGACAGTAGACGCTG              |                     |
| To prepare the DNA probes used in Northern blotting for detection of the BcPV2 dsRNAs                     |                                   |                     |
| RdRp-f2                                                                                                   | GATCAATCGACGTACCAAA               | 946 bp              |

|                                                              |                      |        |
|--------------------------------------------------------------|----------------------|--------|
| RdRp-r2                                                      | AAGAGCAGATTGACCGAC   |        |
| CP-f2                                                        | ACGACTCCCGTTCCTTT    |        |
| CP-r2                                                        | TTCTTCAGTTTCGGTTGG   | 629 bp |
| To detect expression of <i>bcik1</i> in QT5-19 and B05.10    |                      |        |
| Bcbik1-f                                                     | GTTCGCAGACGAGCTGAAA  |        |
| Bcbik1-r                                                     | TCGATCTTTGGTCAGGCTCT | 679 bp |
| To detect expression of <i>bcik2</i> in QT5-19 and B05.10    |                      |        |
| Bcbik2-f                                                     | TGGCGATGCAGCTTGTAAGA |        |
| Bcbik2-r                                                     | GACTCGCAAACATCCGC    | 503 bp |
| To detect expression of <i>bcik3</i> in QT5-19 and B05.10    |                      |        |
| Bcbik3-f                                                     | TTGCGTCTATGGTTACCGCT |        |
| Bcbik3-r                                                     | AAGGCTTCGGCTAGCTTCAC | 348 bp |
| To detect expression of <i>bcik4</i> in QT5-19 and INRA 1750 |                      |        |
| Bcbik4-f                                                     | TTCATCTACGCCGTACGCTC |        |
| Bcbik4-r                                                     | TGTGGCACCTCGAGTTCTTC | 212 bp |
| To detect expression of <i>bcik5</i> in QT5-19 and B05.10    |                      |        |
| Bcbik5-f                                                     | GGATGCCATCGCTTCTCTGA |        |
| Bcbik5-r                                                     | TCACACCTGACCAACGTGAG | 570 bp |
| To detect expression of <i>bcik6</i> in QT5-19 and B05.10    |                      |        |
| Bcbik6-f                                                     | ATCTGCCTGCTGCTTACGAT |        |
| Bcbik6-r                                                     | AAGATGGTGGTGAAGCCAAC | 572 bp |

Note: The primer pair ActF/ActR was designed based on the actA gene in *Botryotinia fuckeliana* (GenBank Acc. No. AJ000335.1). The primer set for RT-PCR detection of the expression of *bcik1* was adopted from Schumacher and colleagues (2013) (Schumacher *et al.*, 2013. *PLoS ONE* 8, e53729). The primer sets for RT-PCR detection of *bcik2*, *bcik3*, *bcik4*, *bcik5*, *bcik6* were designed based on the DNA sequences of these genes under the GenBank accession numbers HE802545, HE802546, HE802547, HE802548, HE802549, respectively.

**Table S2.** List of partitiviruses for multiple sequence alignment and phylogenetic analysis.

| Name                                                          | GenBank Acc. No. |              | Genus                    |                         |
|---------------------------------------------------------------|------------------|--------------|--------------------------|-------------------------|
|                                                               | dsRNA 1          | dsRNA 2      |                          |                         |
| Botrytis cinerea Partitivirus 2 (BcPV2)★                      | MG011707         | MG011708     | <i>Alphapartitivirus</i> |                         |
| Beet cryptic virus 1(BCV1)                                    | ACA81389         | ACA81390     |                          |                         |
| Carrot cryptic virus (CCV)                                    | ACL93278         | ACL93279     |                          |                         |
| Ceratobasidium partitivirus (CPV)                             | AOX47571         | AOX47604     |                          |                         |
| Cherry chlorotic rusty spot associated partitivirus (CCRSaPV) | CAH03668         | CAH03669     |                          |                         |
| Chondrostereum purpureum cryptic virus 1 (CpCV1)              | CAQ53729         | CAQ53730     |                          |                         |
| Dill clover cryptic virus 1 (DCV1)                            | KF484726         | AGY36137     |                          |                         |
| Diuris pendunculata cryptic virus (DpCV)                      | AFQ95555         | AFY23215     |                          |                         |
| Flammulina velutipes browning virus (FvBV)                    | BAH56481         | BAH56482     |                          |                         |
| Helicobasidium mompa partitivirus V70 (HmPVV70)               | BAC23065         | -            |                          |                         |
| Heterobasidion partitivirus 1 (HetPV1)                        | ADV15441         | ADV15442     |                          |                         |
| Heterobasidion partitivirus 12 (HetPV12)                      | AHL25151         | AHL25152     |                          |                         |
| Heterobasidion partitivirus 13 (HetPV13)                      | AHL25153         | AHL25154     |                          |                         |
| Heterobasidion partitivirus 15 (HetPV15)                      | AHL25162         | AHL25163     |                          |                         |
| Heterobasidion partitivirus 3 (HetPV3)                        | ACO37245         | ACO37246     |                          |                         |
| Powdery mildew-associated partitivirus (PmAPV)                | AOF47283         | AOF47284     |                          |                         |
| Rhizoctonia solani partitivirus 2 (RsPV2)                     | AGY54938         | AGY54939     |                          |                         |
| Rosellinia necatrix partitivirus 2 (RnPV2)                    | BAM78602         | BAK53192     |                          |                         |
| Sclerotinia sclerotiorum partitivirus S (SsPV-S)              | ACT55329         | ACT55330     |                          |                         |
| Soybean leaf-associated partitivirus 2 (SLAPV2)               | ALM62247         | ALM62248     |                          |                         |
| Vicia cryptic virus (VCV)                                     | EF173389         | EF173390     |                          |                         |
| White clover cryptic virus 1 (WCCV1)                          | AAU14888         | AAU14889     |                          |                         |
| Atkinsonella hypoxylon partitivirus (AhV)                     | AAA61829         | AAA61830     |                          | <i>Betapartitivirus</i> |
| Botrytis cinerea Partitivirus 1 (BcPV1)                       | -                | AGQ21570     |                          |                         |
| Cannabis cryptic virus (CaCV)                                 | AET80948         | AET80949     |                          |                         |
| Dill cryptic virus 2 (DCV2)                                   | AGJ83771         | AGJ83772     |                          |                         |
| Fusarium poae virus 1 (FpV1)                                  | NP_624349        | NP_624348    |                          |                         |
| Grapevine partitivirus (GPV)                                  | AFX73019         | -            |                          |                         |
| Heterobasidion partitivirus 2 (HetRV2)                        | ADL66905         | ADL66906     |                          |                         |
| Heterobasidion partitivirus 8 (HetRV8)                        | AFW17810         | AFW17811     |                          |                         |
| Pleurotus ostreatus virus 1 (PoV1)                            | AAT07072         | AAT06080     |                          |                         |
| Rhizoctonia solani virus 717 (RsV-717)                        | AAF22160         | AAF40300     |                          |                         |
| Rosellinia necatrix partitivirus 1 (RnV1)                     | BAD98237         | BAD98238     |                          |                         |
| Sclerotinia sclerotiorum partitivirus 1 (SsPV1)               | AFR78160         | AFR78159     |                          |                         |
| White clover cryptic virus 2 (WCCV2)                          | AGJ83763         | AGJ83764     |                          |                         |
| Botryotinia fuckeliana partitivirus 1 (BfPV1)                 | YP_001686789     | YP_001686790 | <i>Gammapartitivirus</i> |                         |
| Discula destructiva virus 1 (DdV1)                            | AAG59816         | AAK13165     |                          |                         |
| Discula destructiva virus 2 (DdV2)                            | AAK59379         | AAK59380     |                          |                         |
| Fusarium solani virus 1 (FsV1)                                | BAA09520         | BAA09521     |                          |                         |
| Ophiostoma partitivirus 1 (OPV1)                              | CAJ31886         | CAJ31887     |                          |                         |
| Penicillium stoloniferum virus F (PsV-F)                      | AAU95758         | AAU95759     |                          |                         |
| Penicillium stoloniferum virus S (PsV-S)                      | AAN86834         | AAN86835     |                          |                         |
| Verticillium dahliae partitivirus 1 (VdPV1)                   | AGI52210         | AGI52209     |                          |                         |
| Beet cryptic virus 2 (BCV2)                                   | ADP24757         | AGQ49466     | <i>Deltapartitivirus</i> |                         |
| Fig cryptic virus (FCV)                                       | CBW77436         | CBW77437     |                          |                         |
| Fragaria chiloensis cryptic virus (FcCV)                      | AAZ06131         | ABC73696     |                          |                         |
| Pepper cryptic virus 1 (PCV1)                                 | AEJ07890         | AEJ07891     |                          |                         |



|                                          |              |              |
|------------------------------------------|--------------|--------------|
| Pepper cryptic virus 2 (PCV2)            | AEJ07892     | AEJ07893     |
| Persimmon cryptic virus (PeCV)           | CCH50609     | CCH50610     |
| Raphanus sativus cryptic virus 2 (RsCV2) | YP_001686783 | YP_001686784 |
| Raphanus sativus cryptic virus 3 (RsCV3) | YP_002364401 | YP_002364402 |
| Rose cryptic virus 1 (RoCV1)             | YP_001686786 | YP_001686787 |

---

Note: The symbol “-” indicates that accession number is not available in GenBank.
